# Supplementary material for: Influence of geometric isomerism on the binding of platinum anticancer agents with phospholipids
Source: Royal Society of Chemistry journal article supplement (doi:10.1039/c9dt00753a), 2019-01-01
Supplement: c9dt00753a1.pdf [file c9dt00753a1.pdf]

## SUPPORTING INFORMATION

### Influence of geometric isomerism on the binding of platinum anticancer agents with phospholipids

Anil Kumar Gorle, Junyong Zhang, Susan J. Berners-Price and Nicholas P. Farrell

---

S1: Scientist Model: Reaction of 1,1/*c,c* with DHPA (1:5 mol ratio) (Scheme 1)  
// MicroMath Scientist Model File  
// 11cc with DHPA treating as monomer (Scheme 1)  
IndVars: T  
DepVars: A, B, C, D,E, L,Cl  
Params: KAB,KBA,KBC,KCB,KBE,KEB,KCD,KDC  
A'=-KAB\*A+KBA\*B\*Cl  
B'=KAB\*A-KBA\*B\*Cl-KBC\*B\*L+KCB\*C-B\*KBE\*L+E\*KEB  
C'=KBC\*B\*L-KCB\*C-C\*KCD+D\*KDC  
D'=C\*KCD-D\*KDC  
E'=B\*KBE\*L-E\*KEB  
L'=-B\*KBC\*L+C\*KCB-B\*KBE\*L+E\*KEB  
Cl'=KAB\*A-KBA\*B\*Cl  
// A=Pt-Cl, B=Pt-H<sub>2</sub>O, Cl=Chloride, C = Pt-DHPA(C), D = Pt-DHPA(D), L=DHPA  
// E=Pt-PO<sub>4</sub>  
// Initial Conditions  
T=2080.2  
A=0.0018102  
B=5.2712E-5  
C=1.7086E-5  
D=0.0  
E=0.0  
L=0.0046829  
Cl=6.9798E-5
